# Supplementary material for: The NuRD complex cooperates with SALL4 to orchestrate reprogramming
Source: PubMed Central journal article supplement (PMC10199099; doi:10.1038/s41467-023-38543-0), 2023-05-18
Supplement: 41467_2023_38543_MOESM3_ESM.pdf [file 41467_2023_38543_MOESM3_ESM.pdf]

## Description of Additional Supplementary Files

File Name: Supplementary Data 1

Description: Raw data of chemical screening related to Figure s1c

File Name: Supplementary Data 2

Description: PCR primers for the detection of exogenous insertion of reprogramming factors related to Figure s1j

File Name: Supplementary Data 3

Description: Uncropped scans of gels related to Figure s1j

File Name: Supplementary Data 4

Description: Processed IP-MS data for Figure 1c, 2c, and 4c.

File Name: Supplementary Data 5

Description: shRNA oligos for the construction of pSuper-shRNA to knockdown the genes related to Figure s2a, s3e, s4q

File Name: Supplementary Data 6

Description: q-PCR primers for the detection knockdown efficiency of pSuper-shRNA related to Figure s2a, s3e, s4q
